# Supplementary figures and images for: A high calcium diet containing nonfat dry milk reduces weight gain and associated adipose tissue inflammation in diet-induced obese mice when compared to high calcium alone
Source: Springer Nature journal article supplement (doi:10.1186/1743-7075-9-3), 2012-01-23

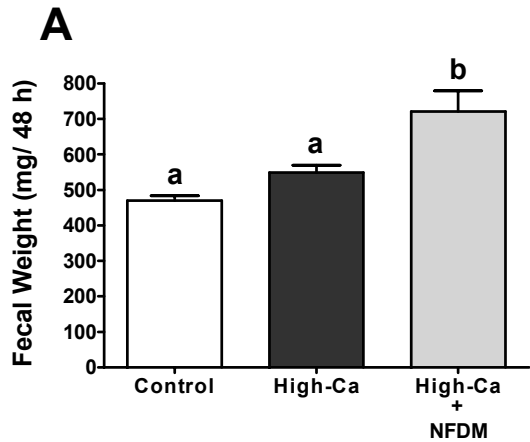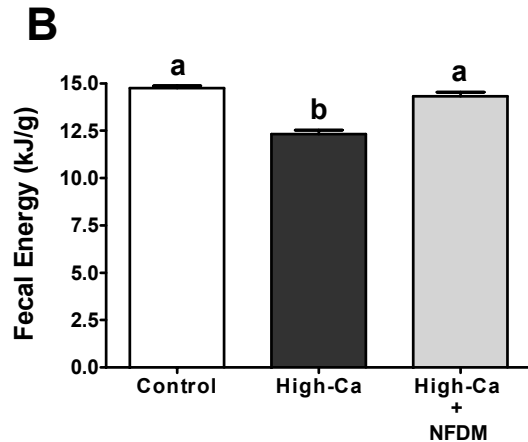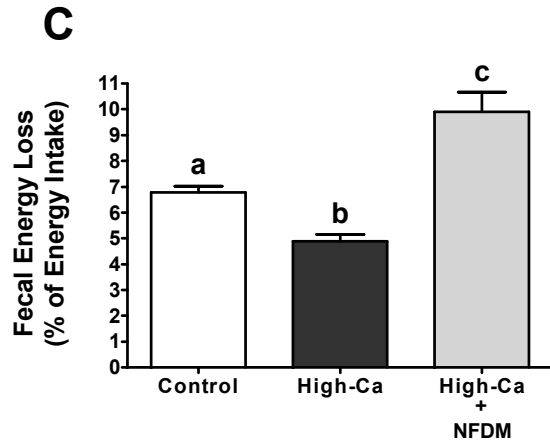

Supplement: Additional file 3 [file 1743-7075-9-3-s3.pdf]
